# Supplementary material for: HO‐1/CO Maintains Intestinal Barrier Integrity through NF‐κB/MLCK Pathway in Intestinal HO‐1-/- Mice
Source: Hindawi journal article supplement (doi:10.1155/2021/6620873), 2021-01-01

**a**

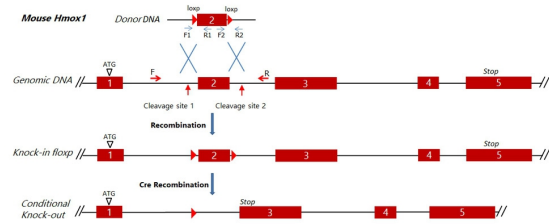**b**

| sgRNA | sites | Target sequences(5'-3') |
|-------|-------|-------------------------|
| sgL1  | 5'    | CTGTTCGATGTTTAAGCAGG    |
| sgL2  | 5'    | GACTGCATCTGTTTCATGG     |
| sgL3  | 5'    | GATTTCGCTGTGGTGGG       |
| sgL4  | 5'    | GAATAGGAGTTCTGCCTGTTG   |
| sgR1  | 3'    | AAGTGACCTTCCTGGACAGG    |
| sgR2  | 3'    | GTAATAGAGGTCGTAATGG     |
| sgR3  | 3'    | CACAGTAAATGATCTTAACTG   |
| sgR4  | 3'    | TTAACCATCTGCTGCATCTGG   |

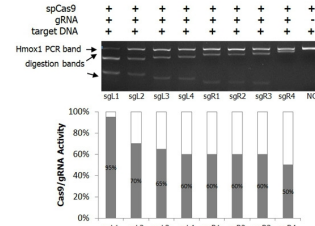

**C**

| sgRNA | sites | Target sequences(5'-3') |
|-------|-------|-------------------------|
| sgL5  | 5'    | TCAGTCATTAAAGTACTATGGG  |
| sgL6  | 5'    | TATTTGCCCCAAAACCAAGG    |
| sgL7  | 5'    | TAAAGGGGGAGGCAACCATGG   |
| sgL8  | 5'    | CCAACCACTATGCTCAAAAGG   |
| sgR5  | 3'    | CTTATTACATTGATACTGTGG   |
| sgR6  | 3'    | GAGAAGATGTGATGGCGGTGG   |
| sgR7  | 3'    | AGTGCACCGAGGTATGGTAAAG  |
| sgR8  | 3'    | GGAACATGATTCTCGAATGG    |

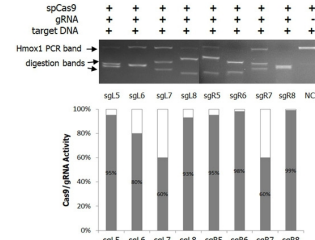

**d**

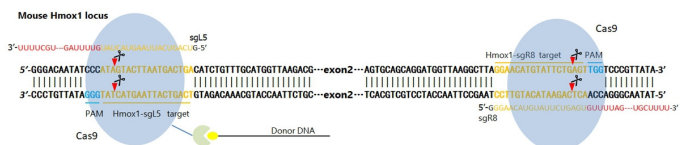

e

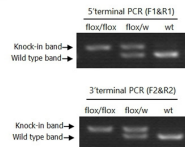**f**

| Mice      | genotypic sequence(5'-3')                                                                                                                                            | genotype |
|-----------|----------------------------------------------------------------------------------------------------------------------------------------------------------------------|----------|
| Wild type | GAGTCTAACTGCGATAG...CTCCCTCAGGGGGTCTCTACTGACGAGGCCAGGCTCTCAACTGTGCTCAGCTCAGTACAGGATGCTGCTAGGGGAGCAGCGGGAACAGGCACGACGACGACGCTCTCTCCGACATCAGAC...TATCTCAGCACTGGGACAAAT |          |
| KO        | GAGTCTAACTGCGATAG...CTCCCTCAGGGGGTCTCTACTGACGAGGCCAGGCTCTCAACTGTGCTCAGCTCAGTACAGGATGCTGCTAGGGGAGCAGCGGGAACAGGCACGACGACGACGCTCTCTCCGACATCAGAC...TATCTCAGCACTGGGACAAAT | homotype |

Sequencing results using primer F & R

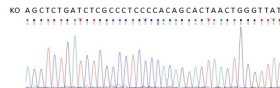

Supplement: f1 [file 6620873.f1.zip]
