# Supplementary figures and images for: HO‐1/CO Maintains Intestinal Barrier Integrity through NF‐κB/MLCK Pathway in Intestinal HO‐1-/- Mice
Source: Hindawi journal article supplement (doi:10.1155/2021/6620873), 2021-01-01

**a**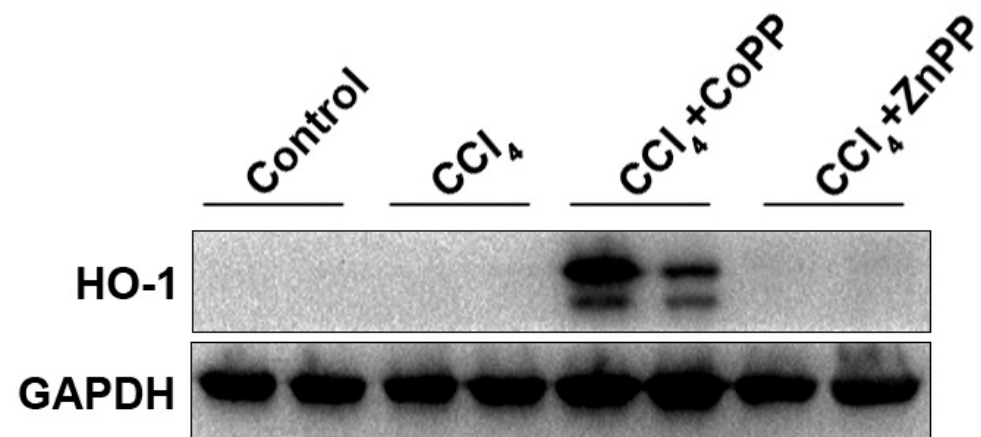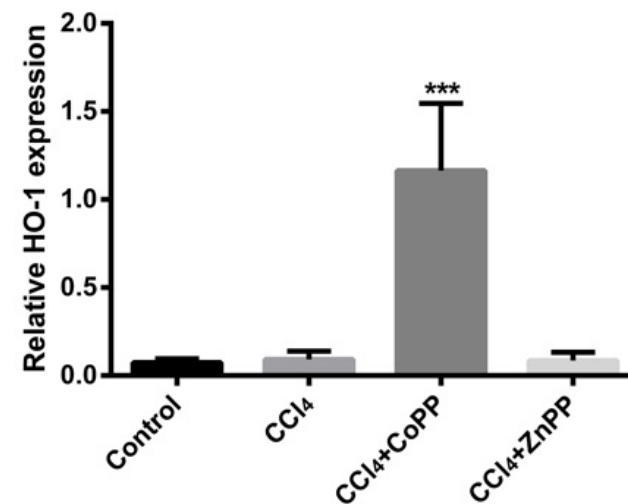**b**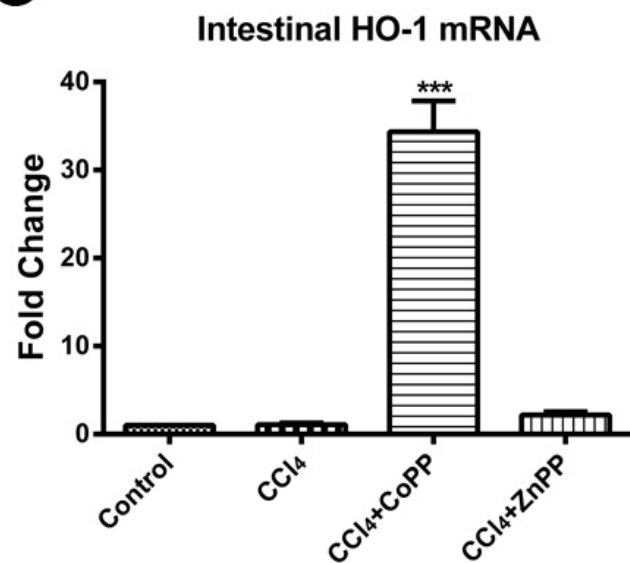

Supplement: f1 [file 6620873.f1.zip]

**a**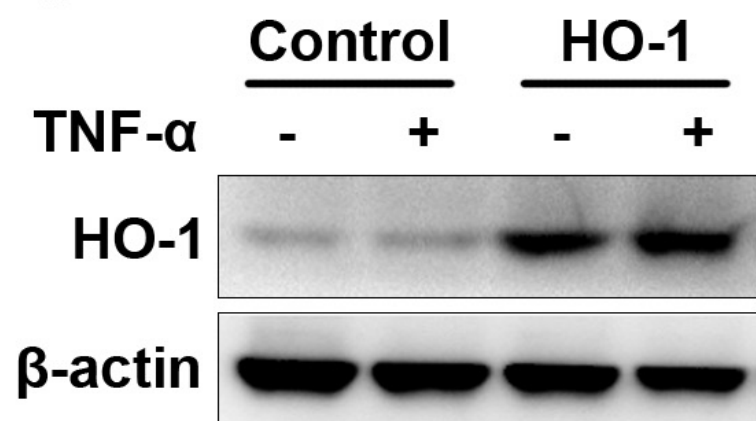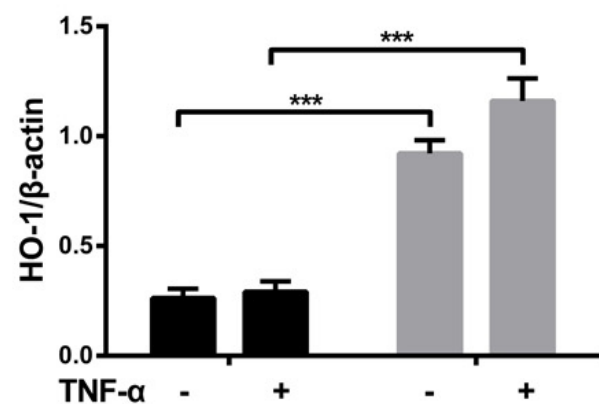**b**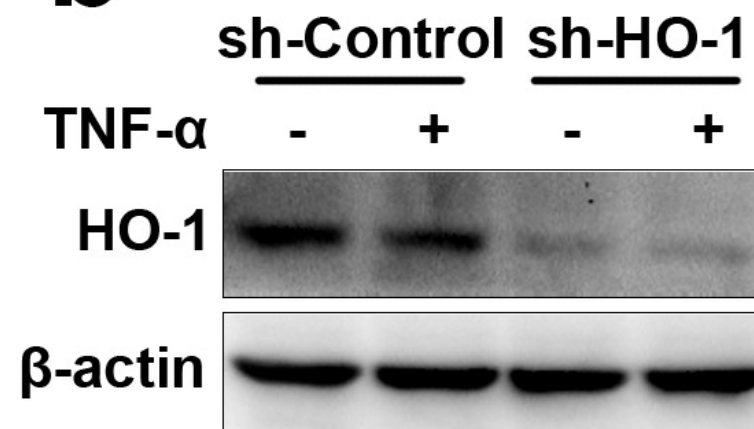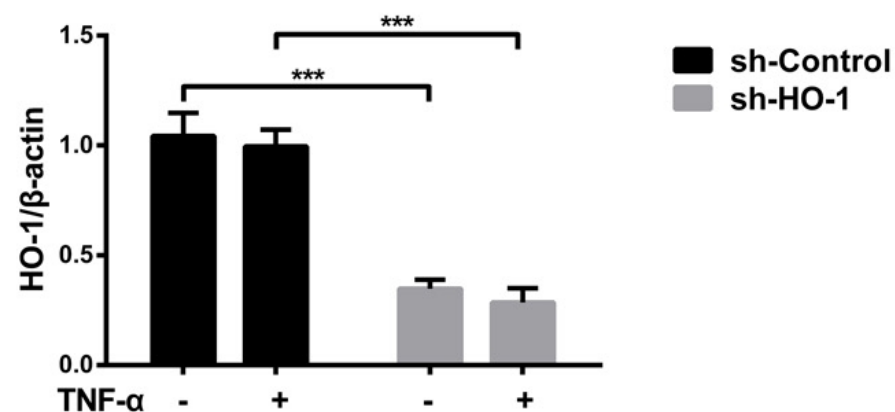

Supplement: f1 [file 6620873.f1.zip]
